# Supplementary material for: Predicting the distributions of Egypt's medicinal plants and their potential shifts under future climate change
Source: PubMed Central journal article supplement (PMC5685616; doi:10.1371/journal.pone.0187714), 2017-11-14
Supplement: pone.0187714.s001.pdf [file pone.0187714.s001.pdf]

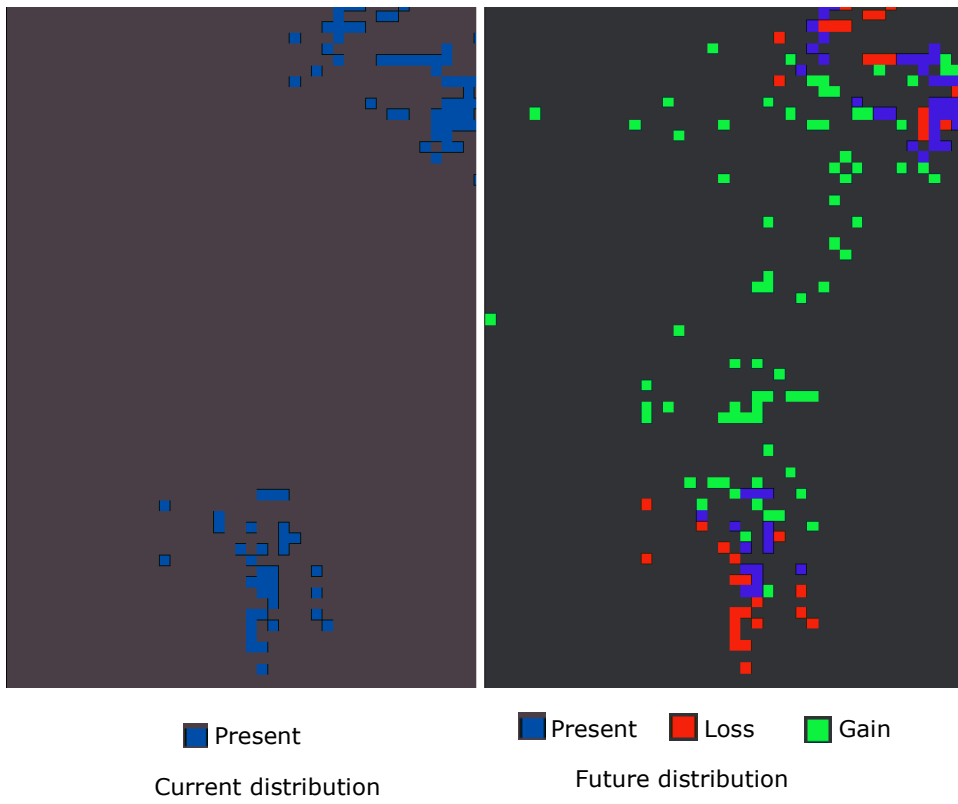

**S1 Fig.** An example to show predicted gain and loss areas in the future distribution of one species.
