# Supplementary material for: Predicting the distributions of Egypt's medicinal plants and their potential shifts under future climate change
Source: PubMed Central journal article supplement (PMC5685616; doi:10.1371/journal.pone.0187714), 2017-11-14
Supplement: pone.0187714.s003.pdf [file pone.0187714.s003.pdf]

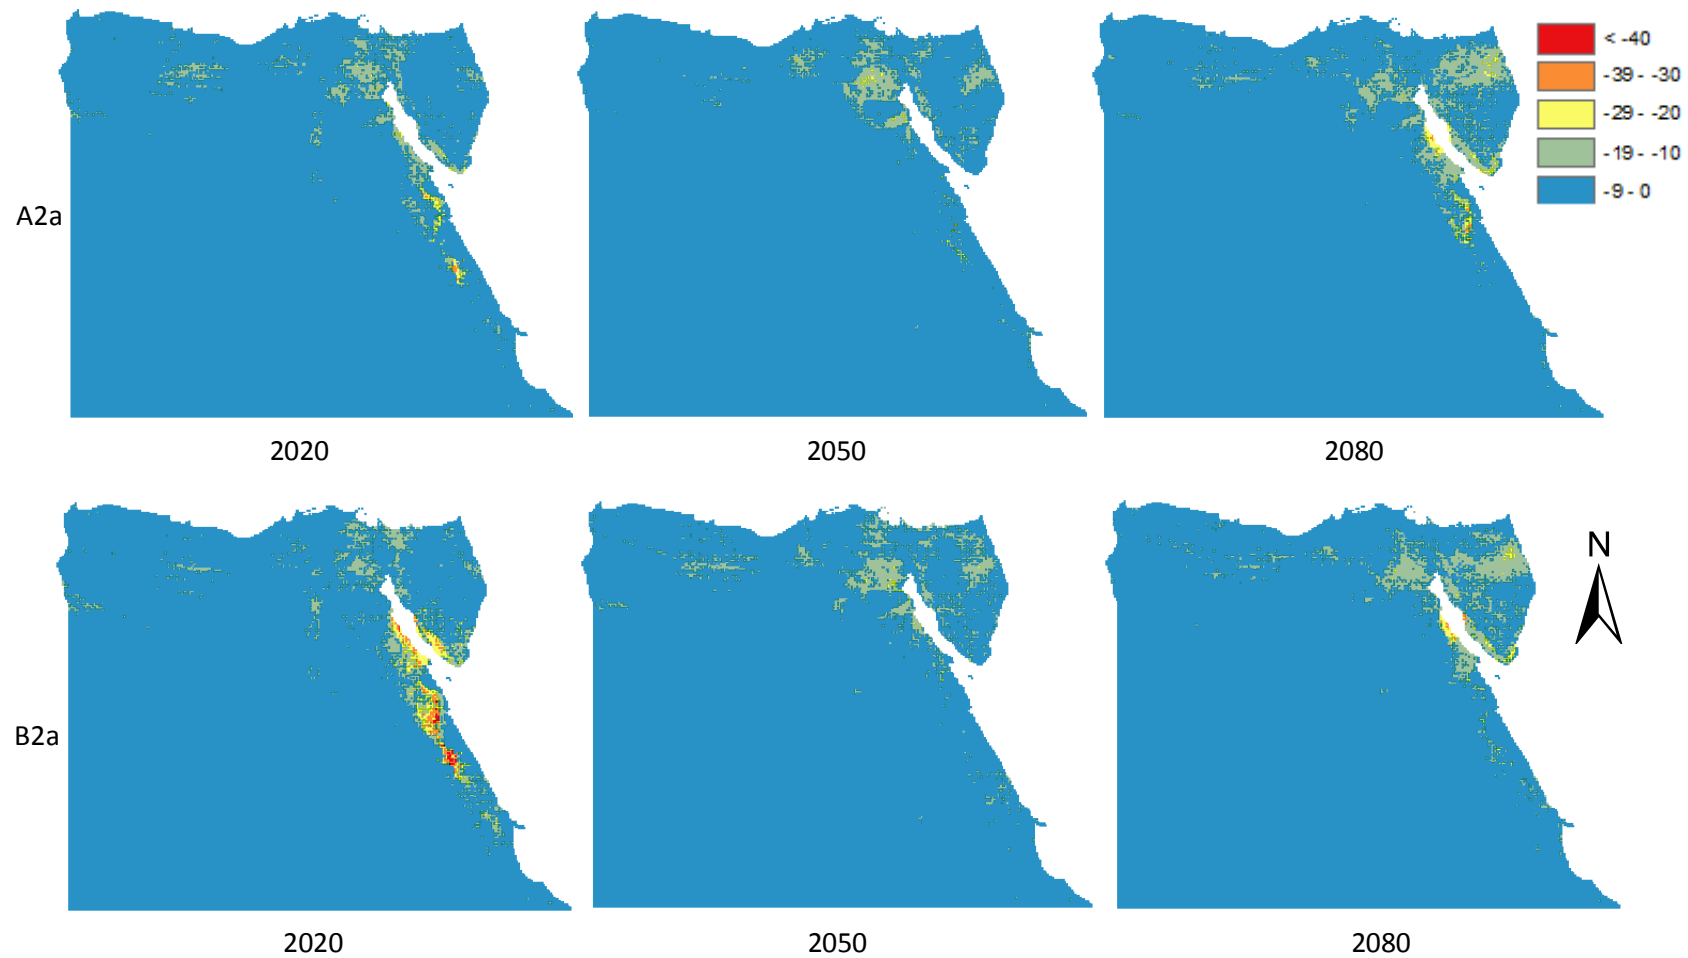

**S3 Fig.** Potential effect of different climate change scenarios (A2a and B2a) on changes in future species richness (using binary species distribution and assuming no-dispersal); maps created as differences between future and current species richness maps (presented in Fig 3). Red means decline future species richness, and blue means increasing future species richness.
