# Supplementary material for: Predicting the distributions of Egypt's medicinal plants and their potential shifts under future climate change
Source: PubMed Central journal article supplement (PMC5685616; doi:10.1371/journal.pone.0187714), 2017-11-14
Supplement: pone.0187714.s004.pdf [file pone.0187714.s004.pdf]

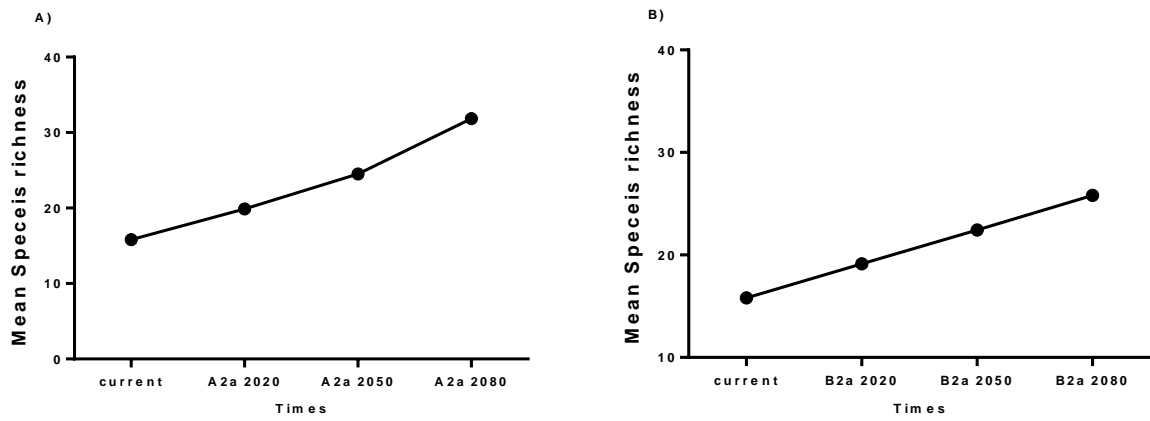

**S4 Fig.** Average predicted mean species richness assuming unlimited dispersal for binary distributions, A): Current and future times with the A2a scenario; B): current and future times with the B2a scenario.
