# Supplementary material for: Predicting the distributions of Egypt's medicinal plants and their potential shifts under future climate change
Source: PubMed Central journal article supplement (PMC5685616; doi:10.1371/journal.pone.0187714), 2017-11-14
Supplement: pone.0187714.s005.pdf [file pone.0187714.s005.pdf]

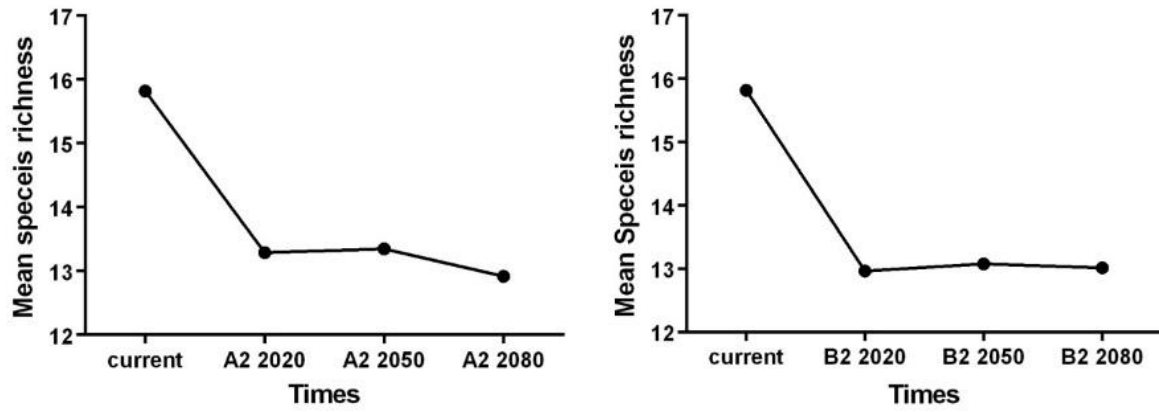

**S5 Fig.** Predicted mean species richness assuming no-limited dispersal for binary distributions for the two scenarios A2a (left) and B2a (right).
