# Supplementary material for: Predicting the distributions of Egypt's medicinal plants and their potential shifts under future climate change
Source: PubMed Central journal article supplement (PMC5685616; doi:10.1371/journal.pone.0187714), 2017-11-14
Supplement: pone.0187714.s006.pdf [file pone.0187714.s006.pdf]

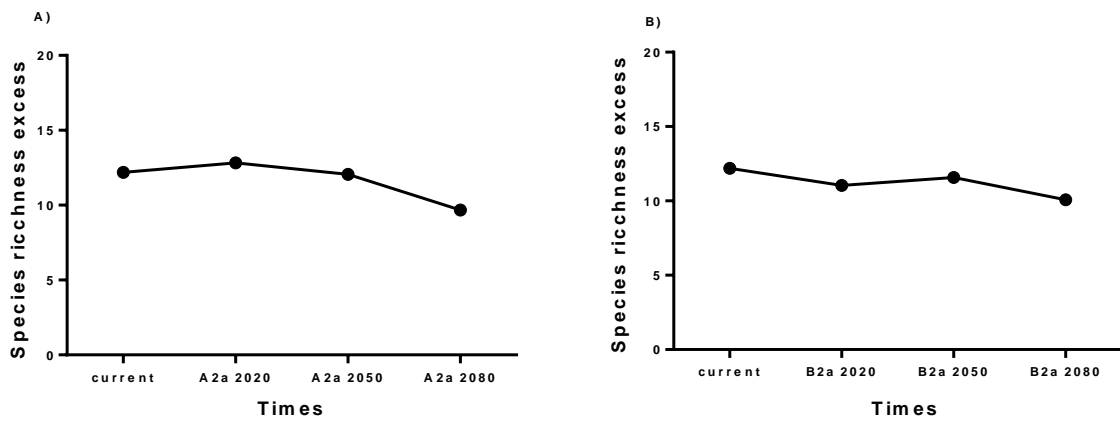

**S6 Fig.** Species richness excess inside relative to outside PAs through time, using binary distributions (both assuming unlimited dispersal). A): A2a scenario; B): B2a scenario.
