# Supplementary material for: Predicting the distributions of Egypt's medicinal plants and their potential shifts under future climate change
Source: PubMed Central journal article supplement (PMC5685616; doi:10.1371/journal.pone.0187714), 2017-11-14
Supplement: pone.0187714.s007.pdf [file pone.0187714.s007.pdf]

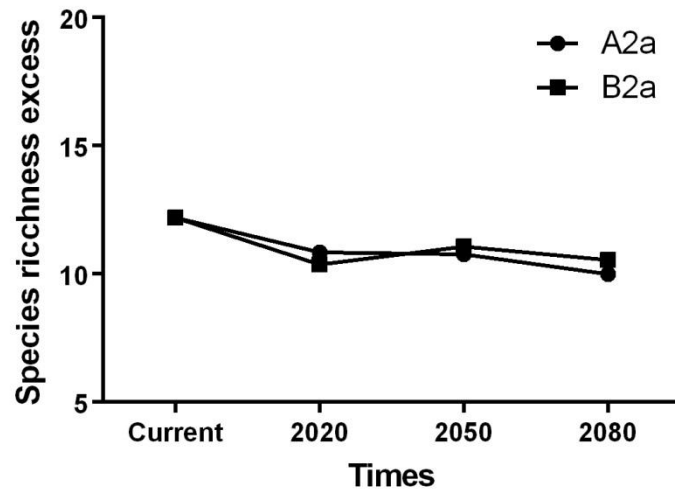

**S7 Fig.** Species richness excess inside relative to outside PAs using binary distribution (assuming no dispersal).
