# Supplementary material for: Predicting the distributions of Egypt's medicinal plants and their potential shifts under future climate change
Source: PubMed Central journal article supplement (PMC5685616; doi:10.1371/journal.pone.0187714), 2017-11-14
Supplement: pone.0187714.s009.pdf [file pone.0187714.s009.pdf]

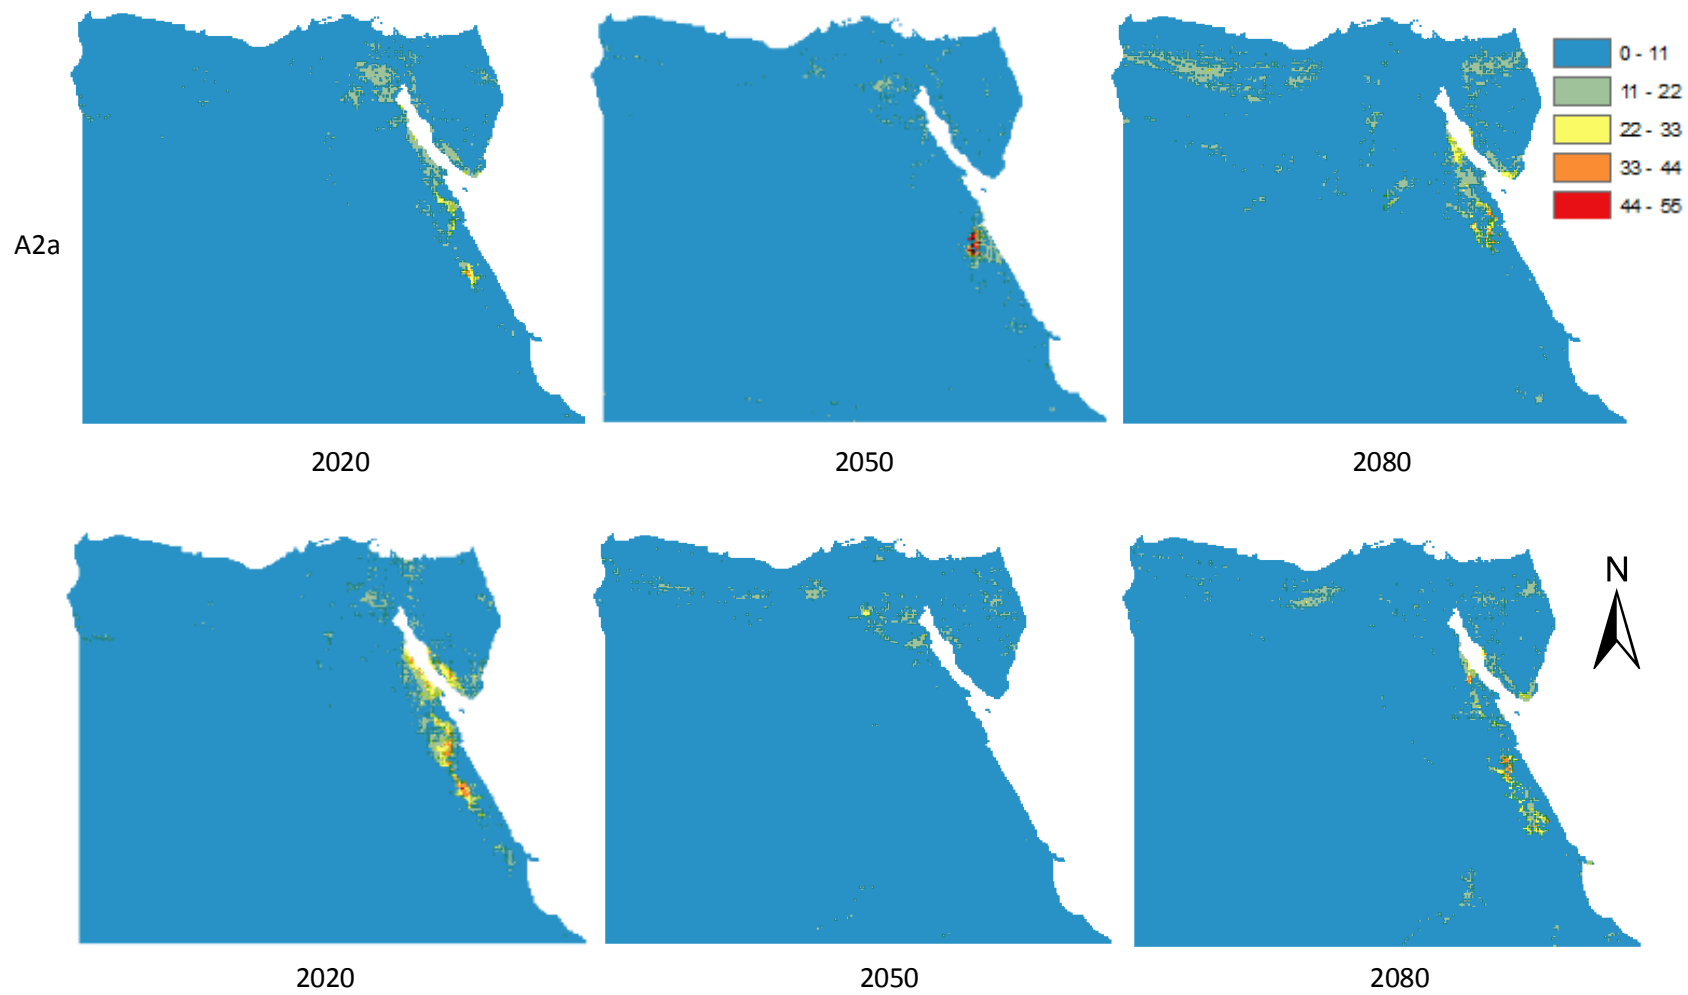

**S9 Fig.** Spatial pattern of the number of species lost under climate change in the future (assuming unlimited dispersal). Colours indicate few (blue) to many (red) species lost.
