# Supplementary material for: Predicting the distributions of Egypt's medicinal plants and their potential shifts under future climate change
Source: PubMed Central journal article supplement (PMC5685616; doi:10.1371/journal.pone.0187714), 2017-11-14
Supplement: pone.0187714.s011.pdf [file pone.0187714.s011.pdf]

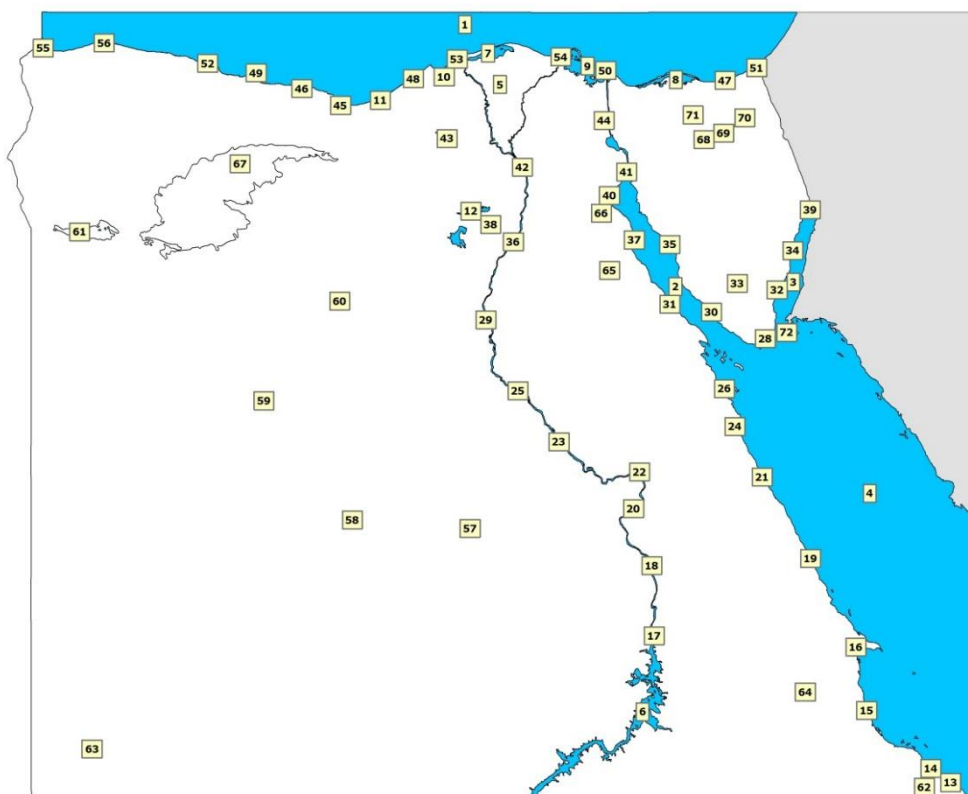

|    |                       |    |                   |    |                              |
|----|-----------------------|----|-------------------|----|------------------------------|
| 1  | The Mediterranean Sea | 25 | Assiut            | 49 | Ras El-Hekma                 |
| 2  | The Suez Gulf         | 26 | Hurghada          | 50 | Port-Said                    |
| 3  | The Aqaba Gulf        | 27 | Ras Mohamed       | 51 | Rafah                        |
| 4  | The Red Sea           | 28 | Sharm El-Sheikh   | 52 | Mersa Matruh                 |
| 5  | The Nile Delta        | 29 | El-Minia          | 53 | Rosetta                      |
| 6  | Lake Nasser           | 30 | El-Tur            | 54 | Damietta                     |
| 7  | Lake Brullus          | 31 | Ras Gharib        | 55 | Sallum                       |
| 8  | Lake Bardawil         | 32 | Dahab             | 56 | Sidi Barrani                 |
| 9  | Lake Manzala          | 33 | Saint-Katherine   | 57 | Kharga oasis                 |
| 10 | Lake Idku             | 34 | Nuweiba           | 58 | Dakhla oasis                 |
| 11 | Lake Mariut           | 35 | Abu Zneima        | 59 | Farafra oasis                |
| 12 | Lake Qarun            | 36 | Beni Suef         | 60 | Bahariya oasis               |
| 13 | Halayeb               | 37 | Ras Zaafarana     | 61 | Siwa oasis                   |
| 14 | Abu Ramad             | 38 | Fayoum            | 62 | Gebel Elba area              |
| 15 | Al-Shalatein          | 39 | Taba              | 63 | El-Gilf El-Kebir             |
| 16 | Berenice              | 40 | Ain Sukhna        | 64 | Gebel Abra q area            |
| 17 | Aswan                 | 41 | Suez              | 65 | Gebel El-Gallala El-Qibliya  |
| 18 | Edfu                  | 42 | The greater Cairo | 66 | Gebel El-Gallala El-Bahariya |
| 19 | Mersa Alam            | 43 | Wadi El-Natrun    | 67 | Qattara Depression           |
| 20 | Luxor                 | 44 | Ismailia          | 68 | Gebel Yillaq                 |
| 21 | El-Quseir             | 45 | El-Alamein        | 69 | El-Hassana                   |
| 22 | Qena                  | 46 | El-Dabaa          | 70 | Gebel El-Hallal              |
| 23 | Sohag                 | 47 | El-Arish          | 71 | Gebel El-Maghara             |
| 24 | Safaga                | 48 | Alexandria        | 72 | Tiran & Sanafir islands      |

**S11 Fig.** Egypt's political border and all cities and geographical regions mentioned in this study (El-Gabbas et al., 2016).
