# Supplementary material for: Predicting the distributions of Egypt's medicinal plants and their potential shifts under future climate change
Source: PubMed Central journal article supplement (PMC5685616; doi:10.1371/journal.pone.0187714), 2017-11-14
Supplement: pone.0187714.s012.pdf [file pone.0187714.s012.pdf]

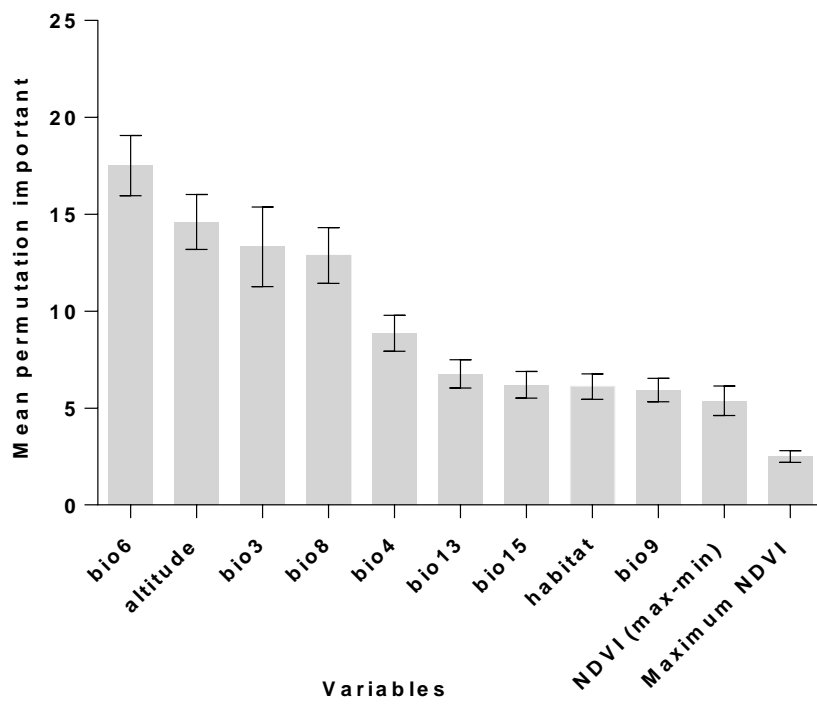

**S12 Fig.** Contribution to the final species distribution models made by each environmental predictor, illustrated by the mean permutation importance (Kaky and Gilbert, 2016).
