# Supplementary material for: Predicting the distributions of Egypt's medicinal plants and their potential shifts under future climate change
Source: PubMed Central journal article supplement (PMC5685616; doi:10.1371/journal.pone.0187714), 2017-11-14
Supplement: pone.0187714.s013.pdf [file pone.0187714.s013.pdf]

**S1 Table.** Overview of greenhouse gas emissions between 1990 – 2100, modified from the IPCC special report on emission scenarios (Nakicenovic *et al.*, 2000). Units are given in the table.

| Gases                                                   | Current | Scenario group |      |      |      |      |      |
|---------------------------------------------------------|---------|----------------|------|------|------|------|------|
|                                                         |         | A2             |      |      | B2   |      |      |
|                                                         |         | 1990           | 2020 | 2050 | 2100 | 2020 | 2050 |
| Carbon dioxide, fossil fuels (GtC/yr)                   | 6       | 11             | 16.5 | 28.9 | 9    | 11.2 | 13.8 |
| Carbon dioxide, land use (GtC/yr)                       | 1.1     | 1.2            | 0.9  | 0.2  | 0    | -0.2 | -0.5 |
| Cumulative carbon dioxide, fossil fuels (GtC) 1990-2100 |         | 1773           |      |      | 1160 |      |      |
| Cumulative carbon dioxide, land use (GtC) 1990-2100     |         | 89             |      |      | 4    |      |      |
| Cumulative carbon dioxide, total (GtC) 1990-2100        |         | 1862           |      |      | 1164 |      |      |
| Methane (MtCH <sub>4</sub> /yr)                         | 310     | 424            | 598  | 889  | 384  | 505  | 597  |
| Nitrous oxide (MtN/yr)                                  | 6.7     | 9.6            | 12   | 16.5 | 6.1  | 6.3  | 6.9  |
| NO <sub>x</sub> (MtN/yr)                                | 30.9    | 50             | 71   | 109  | 43   | 55   | 61   |
