# Supplementary material for: Predicting the distributions of Egypt's medicinal plants and their potential shifts under future climate change
Source: PubMed Central journal article supplement (PMC5685616; doi:10.1371/journal.pone.0187714), 2017-11-14
Supplement: pone.0187714.s014.pdf [file pone.0187714.s014.pdf]

**S2 Table.** Standardized anthropogenic emissions (CO<sub>2</sub>, N<sub>2</sub>O, CH<sub>4</sub>, and NO<sub>x</sub>) for the ALM region (Africa and Latin America), the region containing our study area; modified from (Nakicenovic *et al.*, 2000) Units given in the table.

| Gases                                 | Current | Scenario group |       |        |       |       |       |
|---------------------------------------|---------|----------------|-------|--------|-------|-------|-------|
|                                       |         | A2             |       |        | B2    |       |       |
|                                       | 1990    | 2020           | 2050  | 2100   | 2020  | 2050  | 2100  |
| Carbon dioxide, fossil fuels (GtC/yr) | 1.30    | 1.22           | 1.52  | 2.41   | 0.81  | 1.24  | 1.18  |
| Carbon dioxide, land use (GtC/yr)     | 0.00    | 0.00           | 0.00  | 0.00   | -0.18 | -0.04 | -0.04 |
| Total CO <sub>2</sub>                 | 1.30    | 1.22           | 1.52  | 2.41   | 0.63  | 1.20  | 1.14  |
| Methane total (MtCH <sub>4</sub> /yr) | 47.10   | 45.80          | 78.00 | 143.20 | 39.80 | 52.90 | 47.00 |
| Nitrous oxide total (MtN/yr)          | 0.60    | 0.70           | 0.80  | 1.00   | 0.60  | 0.60  | 0.70  |
| NO <sub>x</sub> (MtN/yr)              | 4.70    | 4.00           | 5.30  | 7.60   | 3.20  | 5.20  | 3.70  |
