# Supplementary material for: Predicting the distributions of Egypt's medicinal plants and their potential shifts under future climate change
Source: PubMed Central journal article supplement (PMC5685616; doi:10.1371/journal.pone.0187714), 2017-11-14
Supplement: pone.0187714.s015.pdf [file pone.0187714.s015.pdf]

**S3 Table.** Mean number of species gained, lost, and turnover under both dispersal assumptions (unlimited and no dispersal) for both scenarios (A2 and B2) at various future times (2020, 2050, and 2080).

| Measurements          | Unlimited dispersal |      |       |             |      |      | No dispersal                                      |      |      |             |      |      |
|-----------------------|---------------------|------|-------|-------------|------|------|---------------------------------------------------|------|------|-------------|------|------|
|                       | A2 Scenario         |      |       | B2 Scenario |      |      | A2 Scenario                                       |      |      | B2 Scenario |      |      |
|                       | 2020                | 2050 | 2080  | 2020        | 2050 | 2080 | 2020                                              | 2050 | 2080 | 2020        | 2050 | 2080 |
| Mean species gained   | 7.41                | 6.44 | 9.21  | 6.19        | 5.37 | 5.58 | There are no species gained under this assumption |      |      |             |      |      |
| Mean species lost     | 1.84                | 1.83 | 2.85  | 1.8         | 2.08 | 2.22 | 1.47                                              | 0.69 | 1.07 | 1.8         | 1.06 | 0.77 |
| Mean species turnover | 9.24                | 8.27 | 12.05 | 7.99        | 7.45 | 7.8  | 1.47                                              | 0.69 | 1.07 | 1.8         | 1.06 | 0.77 |
