# Supplementary material for: Predicting the distributions of Egypt's medicinal plants and their potential shifts under future climate change
Source: PubMed Central journal article supplement (PMC5685616; doi:10.1371/journal.pone.0187714), 2017-11-14
Supplement: pone.0187714.s016.pdf [file pone.0187714.s016.pdf]

**S4 Table.** Mean value for all environmental variables related to temperature and precipitation.

| Environmental Variables                         | Current | Scenario groups |         |         |         |         |         |
|-------------------------------------------------|---------|-----------------|---------|---------|---------|---------|---------|
|                                                 |         | A2              |         |         | B2      |         |         |
|                                                 |         | 2020            | 2050    | 2080    | 2020    | 2050    | 2080    |
| Isothermality (Bio3)                            | 47.93   | 46.44           | 46.06   | 44.63   | 47.09   | 46.40   | 45.70   |
| Temperature seasonality (Bio4)                  | 5843.36 | 5959.45         | 6051.81 | 6378.62 | 5868.28 | 6063.21 | 6207.14 |
| Minimum temperature of the coldest month (Bio6) | 57.58   | 67.63           | 82.48   | 98.58   | 71.21   | 80.12   | 87.41   |
| Mean temperature of the wettest quarter (Bio8)  | 169.95  | 173.86          | 189.36  | 202.97  | 182.35  | 184.74  | 194.62  |
| Mean temperature of the driest quarter (Bio9)   | 200.94  | 199.16          | 218.48  | 224.28  | 199.22  | 213.3   | 218.4   |
| precipitation of the wettest month (Bio13)      | 3.83    | 3.37            | 3.56    | 3.21    | 3.42    | 3.25    | 3.20    |
| precipitation seasonality (Bio15)               | 45.19   | 36.77           | 42.44   | 40.41   | 40.21   | 36.18   | 40.53   |
