# Supplementary material for: Predicting the distributions of Egypt's medicinal plants and their potential shifts under future climate change
Source: PubMed Central journal article supplement (PMC5685616; doi:10.1371/journal.pone.0187714), 2017-11-14
Supplement: pone.0187714.s017.pdf [file pone.0187714.s017.pdf]

**S5 Table.** List of the plant species and their status, with the number of the records within Egypt.

| Speceis                          | Native     | World Status | Egypt Status | Number of records |
|----------------------------------|------------|--------------|--------------|-------------------|
| <i>Acacia pachyceras</i>         | native     | restricted   | localized    | 11                |
| <i>Acacia tortilis</i>           | native     | narrow       | widespread   | 242               |
| <i>Achillea fragrantissima</i>   | native     | restricted   | widespread   | 239               |
| <i>Achillea santolina</i>        | native     | narrow       | widespread   | 13                |
| <i>Adonis dentata</i>            | native     | narrow       | narrow       | 33                |
| <i>Aerva javanica</i>            | native     | widespread   | widespread   | 175               |
| <i>Agathophora alopecuroides</i> | native     | narrow       | narrow       | 26                |
| <i>Alhagi graecorum</i>          | native     | narrow       | widespread   | 100               |
| <i>Anabasis articulata</i>       | native     | narrow       | widespread   | 126               |
| <i>Anagallis arvensis</i>        | native     | widespread   | widespread   | 119               |
| <i>Anastatica hierochuntica</i>  | native     | narrow       | widespread   | 31                |
| <i>Andrachne aspera</i>          | native     | narrow       | widespread   | 31                |
| <i>Artemisia judaica</i>         | native     | narrow       | widespread   | 684               |
| <i>Artemisia monosperma</i>      | native     | restricted   | narrow       | 115               |
| <i>Asclepias sinaica</i>         | native     | near-endemic | narrow       | 31                |
| <i>Asparagus stipularis</i>      | native     | narrow       | widespread   | 20                |
| <i>Atriplex halimus</i>          | native     | narrow       | narrow       | 125               |
| <i>Avena barbata</i>             | native     | narrow       | widespread   | 22                |
| <i>Ballota undulata</i>          | native     | restricted   | narrow       | 124               |
| <i>Bassia muricata</i>           | native     | narrow       | widespread   | 83                |
| <i>Calendula arvensis</i>        | native     | widespread   | widespread   | 66                |
| <i>Calotropis procera</i>        | native     | widespread   | widespread   | 228               |
| <i>Capparis spinosa</i>          | native     | narrow       | localized    | 241               |
| <i>Chenopodium album</i>         | native     | widespread   | widespread   | 166               |
| <i>Chenopodium murale</i>        | native     | widespread   | widespread   | 319               |
| <i>Chiliadenus montanus</i>      | native     | near-endemic | narrow       | 88                |
| <i>Citrullus colocynthis</i>     | native     | narrow       | widespread   | 168               |
| <i>Cleome amblyocarpa</i>        | native     | narrow       | widespread   | 71                |
| <i>Colutea istria</i>            | native     | restricted   | localized    | 24                |
| <i>Cornulaca monacantha</i>      | native     | widespread   | widespread   | 93                |
| <i>Cymbopogon schoenanthus</i>   | native     | narrow       | narrow       | 15                |
| <i>Cynodon dactylon</i>          | native     | widespread   | widespread   | 240               |
| <i>Deverra tortuosa</i>          | native     | restricted   | widespread   | 141               |
| <i>Deverra triradiata</i>        | native     | restricted   | narrow       | 64                |
| <i>Diplotaxis acris</i>          | native     | narrow       | narrow       | 60                |
| <i>Diplotaxis eruroides</i>      | native     | widespread   | widespread   | 12                |
| <i>Diplotaxis harra</i>          | native     | restricted   | narrow       | 147               |
| <i>Echinops spinosus</i>         | native     | narrow       | widespread   | 213               |
| <i>Ephedra alata</i>             | native     | narrow       | widespread   | 46                |
| <i>Eruca sativa</i>              | non-native | widespread   | widespread   | 96                |
| <i>Euphorbia peplis</i>          | native     | narrow       | narrow       | 13                |
| <i>Euphorbia retusa</i>          | native     | narrow       | narrow       | 114               |
| <i>Fagonia arabica</i>           | native     | restricted   | widespread   | 294               |

|                                      |        |              |            |     |
|--------------------------------------|--------|--------------|------------|-----|
| <i>Fagonia glutinosa</i>             | native | narrow       | narrow     | 125 |
| <i>Fagonia mollis</i>                | native | near-endemic | narrow     | 698 |
| <i>Farsetia aegyptia</i>             | native | narrow       | widespread | 114 |
| <i>Globularia arabica</i>            | native | restricted   | narrow     | 51  |
| <i>Gypsophila capillaris</i>         | native | narrow       | localized  | 59  |
| <i>Halocnemum strobilaceum</i>       | native | widespread   | widespread | 53  |
| <i>Haloxylon salicornicum</i>        | native | narrow       | widespread | 242 |
| <i>Haloxylon scoparium</i>           | native | narrow       | narrow     | 36  |
| <i>Haplophyllum tuberculatum</i>     | native | narrow       | widespread | 73  |
| <i>Heliotropium arbainese</i>        | native | narrow       | widespread | 146 |
| <i>Herniaria hirsuta</i>             | native | widespread   | widespread | 13  |
| <i>Hyoscyamus muticus</i>            | native | narrow       | widespread | 143 |
| <i>Imperata cylindrica</i>           | native | widespread   | widespread | 109 |
| <i>Iphiona mucronata</i>             | native | near-endemic | narrow     | 53  |
| <i>Juncus rigidus</i>                | native | narrow       | widespread | 235 |
| <i>Lavandula pubescens</i>           | native | restricted   | narrow     | 15  |
| <i>Lycium shawii</i>                 | native | restricted   | widespread | 161 |
| <i>Malva parviflora</i>              | native | widespread   | widespread | 165 |
| <i>Melilotus indicus</i>             | native | widespread   | widespread | 239 |
| <i>Mesembryanthemum crystallinum</i> | native | widespread   | widespread | 38  |
| <i>Mesembryanthemum forsskaolli</i>  | native | restricted   | widespread | 13  |
| <i>Mesembryanthemum nodiflorum</i>   | native | narrow       | narrow     | 79  |
| <i>Moltkiopsis ciliata</i>           | native | narrow       | widespread | 181 |
| <i>Nitraria retusa</i>               | native | narrow       | widespread | 100 |
| <i>Noaea mucronata</i>               | native | narrow       | narrow     | 47  |
| <i>Ochradenus baccatus</i>           | native | narrow       | widespread | 137 |
| <i>Orobanche cernua</i>              | native | widespread   | widespread | 42  |
| <i>Pancratium sickenbergeri</i>      | native | near-endemic | narrow     | 42  |
| <i>Panicum turgidum</i>              | native | narrow       | widespread | 164 |
| <i>Paronychia arabica</i>            | native | narrow       | narrow     | 169 |
| <i>Paronychia argentea</i>           | native | narrow       | narrow     | 17  |
| <i>Peganum harmala</i>               | native | widespread   | narrow     | 138 |
| <i>Pergularia tomentosa</i>          | native | narrow       | widespread | 362 |
| <i>Phoenix dactylifera</i>           | native | widespread   | widespread | 64  |
| <i>Phragmites australis</i>          | native | narrow       | narrow     | 128 |
| <i>Plantago afra</i>                 | native | narrow       | widespread | 43  |
| <i>Plantago ovata</i>                | native | narrow       | widespread | 36  |
| <i>Pluchea dioscoridis</i>           | native | narrow       | widespread | 62  |
| <i>Polycarpaea repens</i>            | native | narrow       | narrow     | 172 |
| <i>Polycarpon succulentum</i>        | native | restricted   | widespread | 94  |
| <i>Pulicaria undulata</i>            | native | narrow       | widespread | 271 |
| <i>Reaumuria hirtella</i>            | native | restricted   | localized  | 109 |
| <i>Reichardia tingitana</i>          | native | widespread   | widespread | 120 |
| <i>Retama raetam</i>                 | native | narrow       | narrow     | 261 |
| <i>Salvia aegyptiaca</i>             | native | narrow       | widespread | 69  |
| <i>Salvia lanigera</i>               | native | narrow       | narrow     | 44  |

|                                |            |              |            |     |
|--------------------------------|------------|--------------|------------|-----|
| <i>Senecio glaucus</i>         | native     | narrow       | widespread | 159 |
| <i>Seriphidium herba-album</i> | native     | narrow       | widespread | 267 |
| <i>Silene succulenta</i>       | native     | restricted   | localized  | 25  |
| <i>Silene villosa</i>          | native     | narrow       | widespread | 51  |
| <i>Sisymbrium irio</i>         | native     | widespread   | widespread | 56  |
| <i>Solanum elaeagnifolium</i>  | non-native | widespread   | narrow     | 24  |
| <i>Solanum nigrum</i>          | native     | endemic      | localized  | 199 |
| <i>Stachys aegyptiaca</i>      | native     | near-endemic | narrow     | 168 |
| <i>Stipagrostis scoparia</i>   | native     | restricted   | widespread | 49  |
| <i>Tamarix aphylla</i>         | native     | narrow       | widespread | 86  |
| <i>Tamarix nilotica</i>        | native     | narrow       | widespread | 332 |
| <i>Tephrosia purpurea</i>      | native     | near-endemic | widespread | 78  |
| <i>Teucrium leucocladum</i>    | native     | near-endemic | narrow     | 66  |
| <i>Teucrium polium</i>         | native     | narrow       | narrow     | 133 |
| <i>Thymelaea hirsuta</i>       | native     | narrow       | widespread | 61  |
| <i>Tribulus terrestris</i>     | native     | widespread   | widespread | 65  |
| <i>Trifolium resupinatum</i>   | native     | narrow       | widespread | 126 |
| <i>Trigonella stellata</i>     | native     | narrow       | widespread | 62  |
| <i>Urginea maritima</i>        | native     | narrow       | narrow     | 24  |
| <i>Urtica urens</i>            | native     | widespread   | widespread | 34  |
| <i>Vicia sativa</i>            | native     | widespread   | localized  | 68  |
| <i>Zilla spinosa</i>           | native     | narrow       | widespread | 632 |
| <i>Zygophyllum album</i>       | native     | narrow       | widespread | 115 |
| <i>Zygophyllum coccineum</i>   | native     | near-endemic | widespread | 488 |
| <i>Zygophyllum dumosum</i>     | native     | near-endemic | narrow     | 27  |
