# Supplementary material for: Predicting the distributions of Egypt's medicinal plants and their potential shifts under future climate change
Source: PubMed Central journal article supplement (PMC5685616; doi:10.1371/journal.pone.0187714), 2017-11-14
Supplement: pone.0187714.s018.pdf [file pone.0187714.s018.pdf]

**S6 Table.** The main sources of the location database of medicinal plants, put together by the BioMAP project 2004-8. Many of the records upon which the MSc and PhD theses are based are in the main Cairo Herbarium, but they declined to give access to their database without payment. The BioMAP team of taxonomists included the organisers of the OpWall expeditions and the Medicinal Plants project, hence their access to these records.

| Number of records | Source                               |           |                                                                                                                                       |                                                                                      |
|-------------------|--------------------------------------|-----------|---------------------------------------------------------------------------------------------------------------------------------------|--------------------------------------------------------------------------------------|
| 1950              | Opwall                               | 2008      | Operation Wallacea Sinai expedition report, unpublished                                                                               |                                                                                      |
| 888               | Gibali MAA                           | 1988      | Studies on the Flora of Northern Sinai                                                                                                | MSc Thesis, Faculty of Science, Cairo University, 403 pp.                            |
| 598               | El Bakry EAH                         | 1982      | Studies on Plant Life in the Cairo-Ismailia Region                                                                                    | MSc Thesis, Cairo University                                                         |
| 591               | North Sinai Medicinal Plants Project | 2004      | unpublished report                                                                                                                    |                                                                                      |
| 521               | Marie AH                             | 2000      | A model for the use of GIS in vegetation mapping of a phytogeographical region ...                                                    | PhD Thesis, Faculty of Science, Al-Azhar University, Cairo                           |
| 494               | Täckholm V                           | 1969      | Alfred Kaiser's Sinai-Herbarium                                                                                                       | Publications of the Cairo University Herbarium, Giza. 181 pp.                        |
| 437               | Fayed AAA et al                      | 2004      | Flora of Saint Katherine Protectorate                                                                                                 | UNEP Conservation & Sustainable Use of Medicinal Plants in Egypt, unpublished report |
| 422               | Abdallah MA et al                    | 1984      | Materials from the CAIM Herbarium, 2nd ed. Flora of the Sinai peninsula                                                               | Cairo, Egypt                                                                         |
| 379               | Opwall                               | 2007      | Operation Wallacea Sinai expedition report, unpublished                                                                               |                                                                                      |
| 361               | Hosni AI                             | 1984      | Taxonomic revision of the species of Caryophyllaceae in Egypt                                                                         | PhD Thesis, Cairo University                                                         |
| 339               | El-Gazzar A                          | 1962-2006 | private database                                                                                                                      |                                                                                      |
| 286               | Abd El_Wahab RH et al                | 2008      | Diversity and distribution of medicinal plants in North Sinai, Egypt                                                                  | African Journal of Environmental Science and Technology 2(7), 157-171                |
| 282               | Eastern Desert MP project            | 2000      | Medicinal plants of the Eastern Desert                                                                                                | unpublished report.                                                                  |
| 278               | Abdallah MS et al                    | 1972      | Natural flora of Egyptian Nubia before the construction of Aswan High Dam                                                             | Ministry of Agriculture, Cairo 83 pp.                                                |
| 276               | Al-Gohary IH                         | 2008      | Floristic composition of eleven wadis in Gebel Elba, Egypt                                                                            | International Journal of Agriculture & Biology 10: 151-160                           |
| 259               | Opwall                               | 2005      | Vegetation and grazing in the St. Katherine Protectorate, South Sinai, Egypt. Operation Wallacea Sinai expedition report, unpublished |                                                                                      |
| 217               | Hosni AI                             | 1978      | Revision of the genus <i>Zygophyllum</i> L. , Sections <i>bipartita</i> and <i>mediterranea</i> in Egypt                              | MSc Thesis, Cairo University                                                         |

|     |                               |      |                                                                                                                                 |                                                                                      |
|-----|-------------------------------|------|---------------------------------------------------------------------------------------------------------------------------------|--------------------------------------------------------------------------------------|
| 214 | El-Gad IAH                    | 1987 | Taxonomic Studies Of The Genus Fagonia (Zygophyllaceae) In Egypt                                                                | MSc Thesis, Cairo University                                                         |
| 214 | Safa SAIA                     | 1992 | Taxonomic studies in the Chenopodiaceae of Egypt                                                                                | MSc Thesis, Cairo University                                                         |
| 210 | El Hadidi AMH                 | 1989 | Flora Of Egypt , Systematic Revision of Boraginaceae                                                                            | PhD Thesis, Cairo University                                                         |
| 197 | Opwall                        | 2006 | Opwall plants report - 2006                                                                                                     | OpWall Plant Report                                                                  |
| 192 | Zareh MMM                     | 1984 | Taxonomic Studies on the Ganaphaliinae (Asteraceae-Inuleae)                                                                     | PhD Thesis, Assiut University                                                        |
| 176 | Al-Gohary IH                  | 1987 | Taxonomic revision of some species of Capparidaceae in Egypt and its verification by some criteria                              | PhD Thesis, Assiut University                                                        |
| 152 | Mohamed NH                    | 1980 | Studies in the genus Juncus in Egypt                                                                                            | MSc Thesis, Cairo University                                                         |
| 135 | El-Gazzar A & El_Demerdash MA | 1998 | Grazing and other ecological pressures in the southern sector of the Gulf of Aqaba                                              | Egyptian Environment Affairs Agency, Cairo                                           |
| 135 | Kenawy SKM                    | 2004 | Taxonomical and ecological studies on the genus Anabasis growing in Egypt.                                                      | MSc Thesis, Al-Azhar University, Cairo                                               |
| 130 | Mohamed NH                    | 1986 | Flora of Egypt, Systematic Revision of Labiatae                                                                                 | PhD Thesis, Cairo University                                                         |
| 130 | Mossallam HA et al            | 2009 | Structure of the common plant population along Alamain- Wadi El- Natrun Desert Road                                             | Australian Journal of Basic & Applied Sciences 3                                     |
| 125 | Abd El-Ghani MM               | 1994 | Weed plant communities of orchards in Siwa Oasis, Egypt                                                                         | Feddes Repertorium 105 (5-6), 387- 398                                               |
| 118 | Heneidak S                    | 2001 | Biosystematic studies on the species of subfamilies Asclepiadoideae and Periplocoideae (family Apocynaceae sensu lato) in Egypt | PhD Thesis, Suez Canal University                                                    |
| 117 | Boulos L                      | 1966 | Flora of the Nile region in Egyptian Nubia.                                                                                     | Feddes Repertorium 73(3): 184-215.                                                   |
| 113 | El-Hashash SA                 | 1991 | Taxonomic and Ecological study of the species of the genus Tamarix L. in Egypt                                                  | MSc Thesis, Cairo University                                                         |
| 112 | Younes AAS                    | 2004 | Ecological studies on vegetation of wadi systems in South Sinai, Egypt                                                          | PhD Thesis, Suez Canal University                                                    |
| 110 | FOE6                          | many | Flora of Egypt (CAIM herbarium?)                                                                                                | 6 1-168                                                                              |
| 108 | El-Bous MMM                   | 1995 | Taxonomical and chemical studies on the Egyptian species of Melilotus                                                           | MSc Thesis, Suez Canal University                                                    |
| 108 | Shaltout KH et al             | 2004 | Floristic survey of the mountainous region of South Sinai: St. Katherine's Protectorate                                         | UNEP Conservation & Sustainable Use of Medicinal Plants in Egypt, unpublished report |
| 103 | Heneidak S et al              | 2006 | Flavonoid glycosides from Egyptian species of the tribe Asclepiadeae (Apocynaceae, subfamily Asclepiadoideae)                   | Biochemical Systematics & Ecology 34: 575-584                                        |
| 100 | El-Wahab RFA                  | 2003 | Ecological evaluation of soil quality in South Sinai, Egypt                                                                     | PhD Thesis, Suez Canal University                                                    |

|    |                           |      |                                                                                                   |                                       |
|----|---------------------------|------|---------------------------------------------------------------------------------------------------|---------------------------------------|
| 99 | El-Naggar SMI             | 1987 | Studies on the family Cruciferae in Egypt                                                         | MSc Thesis, Assiut University         |
| 99 | Kamel WM                  | 1986 | Taxonomic revision and ecological study of the species of the genus Echinops in Egypt             | MSc Thesis, Suez Canal University     |
| 85 | El-Demerdash MA et al     | 1996 | Distribution of the weed communities in the North East Nile Delta, Egypt                          | Feddes Repertorium 107(3-4): 219-232  |
| 84 | Abd El-Ghani MM & Fahmy G | 1994 | Studies on the threatened woody perennial taxa in the flora of Egypt II. Extinct and endemic taxa | Feddes Repertorium 105 (3-4): 243-250 |
| 84 | El-Wahab RFA et al        | 2006 | Landforms, vegetation, and soil quality in South Sinai, Egypt                                     | Catrina 1(2): 127-138                 |
| 84 | Moustafa AAR              | 1986 | Ecological and Phytochemical Studies on Some Species of Labiatae Growing in Sinai                 | MSc Thesis, Suez Canal University     |
| 82 | Herbarium                 | many | Herbarium of the Faculty of Science, Alexandria University                                        |                                       |

a further 3105 records from 164 other sources
